# Supplementary material for: Unusually low genetic divergence at COI barcode locus between two species of intertidal Thalassaphorura (Collembola: Onychiuridae)
Source: PeerJ. 2018 Jun 18;6:e5021. doi: 10.7717/peerj.5021 (PMC6011825; doi:10.7717/peerj.5021)
Supplement: Supplemental Information 1 [file peerj-06-5021-s001.xls]

## Sheet: Tab. x list barcode.txt
species	Country	Locality	ecology	Date	Collectors	Sample_ID in BOLD	Voucher specimen	Sequences code in BOLD
Thalassaphorura bapen	China	Chongzuo: Fusui Xian	forest soil	2005-03-04	Deharveng & Bedos	3258G02_CHIgx05015		COLLF359-10
Thalassaphorura bapen	China	Chongzuo: Fusui Xian	forest soil	2005-03-04	Chen	6129E02_CHIgx05034		COLLH050-10
Thalassaphorura bapen	China	Chongzuo: Fusui Xian	forest soil	2005-03-04	Chen	6129E03_CHIgx05034		COLLH051-10
Thalassaphorura bapen	China	Chongzuo: Fusui Xian	forest soil	2005-03-04	Chen	6129E05_CHIgx05034		COLLH053-10
Thalassaphorura bapen	China	Chongzuo: Fusui Xian	forest soil	2005-03-04	Chen	6129E06_CHIgx05034		COLLH054-10
Thalassaphorura debilis	France	Wimereux	intertidal habitat	2010-03-17	Sun Xin	6127D02_62016	+	COLLG418-10
Thalassaphorura debilis	France	Wimereux	intertidal habitat	2010-03-17	Sun Xin	6127D03_62016	-	COLLG419-10
Thalassaphorura debilis	France	Wimereux	intertidal habitat	2010-03-17	Sun Xin	6127D04_62016	-	COLLG420-10
Thalassaphorura debilis	France	Wimereux	intertidal habitat	2010-03-17	Sun Xin	6127D05_62016	-	COLLG421-10
Thalassaphorura debilis	France	Wimereux	intertidal habitat	2010-03-17	Deharveng & Zon	6131A10_62018	+	COLLG865-10
Thalassaphorura debilis	France	Wimereux	intertidal habitat	2010-03-17	Deharveng & Zon	6131A11_62018	+	COLLG866-10
Thalassaphorura debilis	France	Wimereux	intertidal habitat	2010-03-17	Deharveng & Zon	6131A12_62018	-	COLLG867-10
Thalassaphorura debilis	France	Wimereux	intertidal habitat	2010-03-17	Deharveng & Zon	6131B01_62018	-	COLLG868-10
Thalassaphorura debilis	France	Wimereux	intertidal habitat	2010-03-17	Deharveng & Zon	6131B02_62018	+	COLLG869-10
Thalassaphorura debilis	France	Wimereux	intertidal habitat	2010-08-05	Sun Xin	6138A01_62044	+	COLLH1331-11
Thalassaphorura debilis	France	Wimereux	intertidal habitat	2010-08-05	Sun Xin	6138A02_62044	+	COLLH1332-11
Thalassaphorura debilis	France	Wimereux	intertidal habitat	2010-08-05	Sun Xin	6138A03_62044	+	COLLH1333-11
Thalassaphorura debilis	France	Wimereux	intertidal habitat	2010-08-05	Sun Xin	6138A04_62044	-	COLLH1334-11
Thalassaphorura debilis	France	Wimereux	intertidal habitat	2010-08-05	Sun Xin	6138A05_62044	+	COLLH1335-11
Thalassaphorura debilis	France	Wimereux	intertidal habitat	2010-08-05	Sun Xin	6138A06_62044	+	COLLH1336-11
Thalassaphorura debilis	France	Wimereux	intertidal habitat	2010-08-05	Sun Xin	6138B02_62044	-	COLLH1344-11
Thalassaphorura debilis	France	Wimereux	intertidal habitat	2010-08-05	Sun Xin	6138B03_62044	-	COLLH1345-11
Thalassaphorura debilis	France	Wimereux	intertidal habitat	2010-08-05	Sun Xin	6138B04_62044	+	COLLH1346-11
Thalassaphorura debilis	France	Wimereux	intertidal habitat	2010-08-05	Sun Xin	6138B05_62044	-	COLLH1347-11
Thalassaphorura debilis	France	Wimereux	intertidal habitat	2010-08-05	Sun Xin	6138B06_62044	+	COLLH1348-11
Thalassaphorura debilis	France	Wimereux	intertidal habitat	2010-08-05	Sun Xin	6138A10_62045	+	COLLH1340-11
Thalassaphorura debilis	France	Wimereux	intertidal habitat	2010-08-05	Sun Xin	6138A11_62045	+	COLLH1341-11
Thalassaphorura debilis	France	Wimereux	intertidal habitat	2010-08-05	Sun Xin	6138B08_62045	+	COLLH1350-11
Thalassaphorura debilis	France	Wimereux	intertidal habitat	2010-08-05	Sun Xin	6138B10_62045	+	COLLH1352-11
Thalassaphorura debilis	France	Wimereux	intertidal habitat	2010-08-05	Sun Xin	6138B11_62045	+	COLLH1353-11
Thalassaphorura debilis	France	Wimereux	intertidal habitat	2010-08-05	Sun Xin	6138B12_62045	-	COLLH1354-11
Thalassaphorura encarpata	France	Paris	urban garden	2012-08-10	Deharveng & Sun Xin	10031A09_SAF75.069		COLSA1152-12
Thalassaphorura encarpata	France	Paris	urban garden	2012-08-10	Deharveng & Sun Xin	10031A10_SAF75.069		COLSA1153-12
Thalassaphorura encarpata	France	Paris	urban garden	2012-08-10	Deharveng & Sun Xin	10031A12_SAF75.069		COLSA1155-12
Thalassaphorura encarpata	France	Paris	urban garden	2012-08-10	Deharveng & Sun Xin	10031B01_SAF75.069		COLSA1156-12
Thalassaphorura encarpata	France	Paris	urban garden	2012-08-10	Deharveng & Sun Xin	10031B02_SAF75.069		COLSA1157-12
Thalassaphorura grandis	China	Hechi: Huanjiang Xian	forest soil	2005-03-14	Chen	6133D09_CHIgx05109		COLLH140-10
Thalassaphorura grandis	China	Hechi: Huanjiang Xian	forest soil	2009-02-13	Deharveng	01408D01_CHIgx0904		COLLE464-09
Thalassaphorura grandis	China	Hechi: Huanjiang Xian	forest soil	2009-02-13	Deharveng	01408D02_CHIgx0904		COLLE465-09
Thalassaphorura grandis	China	Hechi: Huanjiang Xian	forest soil	2009-02-13	Deharveng	01408D04_CHIgx0904		COLLE467-09
Thalassaphorura grandis	China	Hechi: Huanjiang Xian	forest soil	2009-02-13	Deharveng	01408D05_CHIgx0904		COLLE468-09
Thalassaphorura petaloides	France	Saint-Cyprien	river bank	2008-09-15	Bedos	6130D07_661010		COLLG803-10
Thalassaphorura petaloides	France	Saint-Cyprien	river bank	2008-09-15	Bedos	6130D08_661010		COLLG804-10
Thalassaphorura petaloides	France	Saint-Cyprien	river bank	2008-09-15	Bedos	6130D09_661010		COLLG805-10
Thalassaphorura petaloides	France	Saint-Cyprien	river bank	2008-09-15	Bedos	6130D10_661010		COLLG806-10
Thalassaphorura petaloides	France	Saint-Cyprien	river bank	2008-09-15	Bedos	6130D11_661010		COLLG807-10
Thalassaphorura thalassophila	France	Wimereux	intertidal habitat	2010-03-17	Sun Xin	6127D06_62016	+	COLLG422-10
Thalassaphorura thalassophila	France	Wimereux	intertidal habitat	2010-03-17	Deharveng & Zon	6131B06_62017	-	COLLG873-10
Thalassaphorura thalassophila	France	Wimereux	intertidal habitat	2010-03-17	Deharveng & Zon	6131B07_62017	+	COLLG874-10
Thalassaphorura thalassophila	France	Wimereux	intertidal habitat	2010-03-17	Deharveng & Zon	6131B08_62017	+	COLLG875-10
Thalassaphorura thalassophila	France	Wimereux	intertidal habitat	2010-08-05	Sun Xin	6138B01_62044	+	COLLH1343-11
Thalassaphorura thalassophila	France	Wimereux	intertidal habitat	2010-08-05	Sun Xin	6138A07_62045	-	COLLH1337-11
Thalassaphorura thalassophila	France	Wimereux	intertidal habitat	2010-08-05	Sun Xin	6138A08_62045	+	COLLH1338-11
Thalassaphorura thalassophila	France	Wimereux	intertidal habitat	2010-08-05	Sun Xin	6138A12_62045	-	COLLH1342-11
Thalassaphorura thalassophila	France	Wimereux	intertidal habitat	2010-08-05	Sun Xin	6138B07_62045	-	COLLH1349-11
Thalassaphorura thalassophila	Great Britain	Dalmeny	intertidal habitat	2016-04-05	Deharveng, Sun Xin & Bedos	25339A01_GB011	+	COLLH6632-16
Thalassaphorura thalassophila	Great Britain	Dalmeny	intertidal habitat	2016-04-05	Deharveng, Sun Xin & Bedos	25339A02_GB011	+	COLLH6633-16
Thalassaphorura thalassophila	Great Britain	Dalmeny	intertidal habitat	2016-04-05	Deharveng, Sun Xin & Bedos	25339A03_GB011	-	COLLH6634-16
Thalassaphorura thalassophila	Great Britain	Dalmeny	intertidal habitat	2016-04-05	Deharveng, Sun Xin & Bedos	25339A04_GB011	+	COLLH6635-16
Thalassaphorura thalassophila	Great Britain	Dalmeny	intertidal habitat	2016-04-05	Deharveng, Sun Xin & Bedos	25339A05_GB011	+	COLLH6636-16
Thalassaphorura thalassophila	Great Britain	Dalmeny	intertidal habitat	2016-04-05	Deharveng, Sun Xin & Bedos	25339A06_GB011	-	COLLH6637-16
Thalassaphorura zschokkei	France	Isola	litter, montane fir forest	2009-08-11	Deharveng & Bedos	6127D07_M090811DB20		COLLG423-10
Thalassaphorura zschokkei	France	Isola	litter, montane fir forest	2009-08-11	Deharveng & Bedos	6127D08_M090811DB20		COLLG424-10
Thalassaphorura zschokkei	France	Isola	litter, montane fir forest	2009-08-11	Deharveng & Bedos	6127D09_M090811DB20		COLLG425-10
Thalassaphorura zschokkei	France	Isola	litter, montane fir forest	2009-08-11	Deharveng & Bedos	6127D10_M090811DB20		COLLG426-10
Thalassaphorura zschokkei	France	Isola	litter, montane fir forest	2009-08-11	Deharveng & Bedos	6127D12_M090811DB20		COLLG428-10
Thalassaphorura zschokkei	France	Saorge	moss, montane fir forest	2010-07-01	Deharveng, Bedos & Sun Xin	db13A12_M100701-DB17		MECOL1241-12
Thalassaphorura zschokkei	France	Saorge	moss, montane fir forest	2010-07-01	Deharveng, Bedos & Sun Xin	db13E12_M100701-DB17		MECOL1245-12
Thalassaphorura zschokkei	France	Saorge	moss, montane fir forest	2010-07-01	Deharveng, Bedos & Sun Xin	db13G12_M100701-DB17		MECOL1247-12
Thalassaphorura zschokkei	France	Uvernet-Fours	moss on rocks, alpine zone	2011-05-27	Deharveng & Bedos	db09E08_M110527-DB07		MECOL829-12
Thalassaphorura zschokkei	France	Uvernet-Fours	moss on rocks, alpine zone	2011-05-27	Deharveng & Bedos	db09F08_M110527-DB07		MECOL830-12
Thalassaphorura zschokkei	France	Uvernet-Fours	moss on rocks, alpine zone	2011-05-27	Deharveng & Bedos	db09H08_M110527-DB07		MECOL832-12
