# Supplementary material for: Unusually low genetic divergence at COI barcode locus between two species of intertidal Thalassaphorura (Collembola: Onychiuridae)
Source: PeerJ. 2018 Jun 18;6:e5021. doi: 10.7717/peerj.5021 (PMC6011825; doi:10.7717/peerj.5021)
Supplement: Supplemental Information 4 [file peerj-06-5021-s004.xlsx]

## Sheet: Feuil1
#ligne orig	microscope	Country	species	new sample code (later)	Nb specimens on slide	sample code	specimen code	skin n°	sexe/age	length mm	AS μm	clawIII μm	unguiculIII μm	pso thI	pso dorsal abd	pso ventr abd	pso Scx	chaetae Scx	unguic/claw	AS/claw	PAO
17	lab MNHN	France	debilis	DF	1	62-016	62-016	6127D02	Male	1.45	25	47.5	20	1	33353	1110	2	4,5,5	0.421053	0.526316	19/?
20	lab MNHN	France	debilis	DF	1	62-016	62-016-2		Female	1.45	22.5	37,5 (I)	15 (I)	1	33354	1110	2	5(4),5,4	0.4	0.6	17/?
21	lab MNHN	France	debilis	$DF	1	62-016	62-016-3N		Male	1.22	22.5	32.5	12.5	1	33343	1110	2	2,3,4	0.384615	0.692308	14/?
22	lab MNHN	France	debilis	DF	1	62-016	62-016-6E		Male	1.5	25	45	17.5	2	33344(3)	1110	2	4,5,4	0.388889	0.555556	15/17
23	lab MNHN	France	debilis	DF	1	62-016	62-016-A		Female	1.5	20.9	28.61	8.27	2	33354	1120	2	4,5,4	0.28906	0.730514	16/?
24	lab Louis	France	debilis	DF	1	62-016	62-016D-5		Female	1.42	?	36.25	16.96	2	33353	1110	2	4,5,5	0.467862	#VALUE!	14/?
25	lab MNHN	France	debilis	$DF	1	62-016	62-016J		$1st	0.83	21.25	25	7.5	2	33343	1110	2	1,2,2	0.3	0.85	$
18	lab MNHN	France	debilis	DF	2	62-018	62-018	6131A09 (A10)	Male	1.4	25	47.5	17.5	1	33343	?1??	2	4,4,4	0.368421	0.526316	16/?
19	lab MNHN	France	debilis	$DF	2	62-018	62-018	6131A10 (A09)	$juv	0.8	15.95	18.73	6.12	2	333?3	1110	2	2,3,3	0.326749	0.851575	$
27	lab MNHN	France	debilis	DF	1	62-018	62-018(1)		Male	1.5	25	42.5	12.5	2	33343	1110	2	4,5,5	0.294118	0.588235	20/21
26	lab MNHN	France	debilis	DF	1	62-018	62-018(2)		Male	1.65	25	50	15	1	33344	1110	2	4,4,4	0.3	0.5	14/14
4	lab MNHN	France	debilis	DF	1	62-044	62-044	06138A01	Female	1.7	?	50	16.25	1	33343	1110	2	5,5,5	0.325	#VALUE!	17/?
5	lab MNHN	France	debilis	DF	1	62-044	62-044	06138A02	Female	1.25	25	32.5	10	1	33353	1110	?	?	0.307692	0.769231	15/15
6	lab MNHN	France	debilis	DF	1	62-044	62-044	06138A03	Male	1.25	28.75	40	15	?	?	?	?	?	0.375	0.71875	17/18
7	lab MNHN	France	debilis	$DF	1	62-044	62-044	06138A05	$?	1.18	25	32.5	12.5	?	?	1110	?	?	0.384615	0.769231	$
8	lab MNHN	France	debilis	DF	2	62-044	62-044	06138A06 (B01)	Male	1.32	17.56	31.79	7.57	?	?	?	?	?	0.27	0.6	15/
11	lab MNHN	France	debilis	DF	1	62-044	62-044	06138B02	Female	1.6	22.5	47.5	17.5	?	?	?	?	?	0.368421	0.473684	17/?
12	lab MNHN	France	debilis	$DF	1	62-044	62-044	06138B04	$?	1.4	22.5	30	8.75	?	?	?	?	?	0.291667	0.75	$
13	lab MNHN	France	debilis	DF	1	62-044	62-044	06138B06	Male	1.55	32.5	52.5	20	?	?	?	?	4,4,4	0.380952	0.619048	15/?
9	lab MNHN	France	debilis	$DF	1	62-045	62-045	06138A10	$juv	1	?	30	10	?	?	?	?	?	0.333333	#VALUE!	$
10	lab MNHN	France	debilis	DF	1	62-045	62-045	06138A11	Female	1.65	26.25	50	17.5	?	????3	??10	?	?,4,4	0.35	0.525	16/?
14	lab MNHN	France	debilis	DF	2	62-045	62-045	06138B08 (A09) L	Female	1.4	?	32.5	10	?	?	?	?	?	0.307692	#VALUE!	15/16
15	lab MNHN	France	debilis	DF	1	62-045	62-045	06138B10	Male	1.63	25	50	20	?	?	?	?	4,?,?	0.4	0.5	16/?
16	lab MNHN	France	debilis	DF	1	62-045	62-045	06138B11	Female	1.75	30	50	20	2	33353	1110	2	4,5,5	0.4	0.6	13/17
76	lab Louis	France	debilis	$DF	2	62-045	62-045 A left		$Female	1.12319	17.2727	34.5455	12.7273	1	33354	1110	2	4,4,4	0.368421	0.5	15/16
77	lab Louis	France	debilis	$DF	2	62-045	62-045 A right		$Male	0.92029	17.2727	27.2727	9.09091	2	33343	1110	2	4,4,4	0.333333	0.633333	16/17?
78	lab Louis	France	debilis	$DF	2	62-045	62-045 B left		$Female	1.23188	20	34.5455	11.8182	2	33354	1110	2	4,4,4	0.342105	0.578947	19/20
79	lab Louis	France	debilis	$DF	2	62-045	62-045 B right		$Male	0.963768	14.5455	27.2727	10.9091	2	33344	1120	2	4,3,3	0.4	0.533333	14/15
80	lab Louis	France	debilis	$DF	2	62-045	62-045 C left		$Female	0.978261	20	32.7273	10.9091	1	33343	1110	2	4,4,4	0.333333	0.611111	18/?
81	lab Louis	France	debilis	$DF	2	62-045	62-045 C right		$Female	1.19565	20	32.7273	11.8182	1	3334?	1110	2	4,4,3	0.361111	0.611111	?16/?
82	lab Louis	France	debilis	$DF	2	62-045	62-045 III right		$Male	0.963768	20	32.7273	12.7273	2	3334(5)4	1110	2	4,4,4	0.388889	0.611111	18/18
34	lab Louis	France	debilis	$DF	2	62-045	62-045-010601 left		$Female	1.07246	19.0909	21.8182	10	2	33354	1110	2	4,4,4	0.458333	0.875	15/?
33	lab MNHN	France	debilis	$DF	2	62-045	62-045-010602R		$1st	0.79	20	25	6.25	2	33343	1110	2	1,2,2	0.25	0.8	$
28	lab MNHN	France	debilis	DF	1	62-045	62-045-2		Female	1.85	33.75	50	17.5	2	3436(5)4	1120	2	4,5,4	0.35	0.675	14/15
29	lab MNHN	France	debilis	DF	1	62-045	62-045-3		Female	2.1	30	55	17.5	1	33344	1100	2	5,5,5(4)	0.318182	0.545455	14/14
30	lab Louis	France	debilis	DF	1	62-045	62-045-4a		Female	1.48	17.81	24.05	7.92	2	33343	1110	2	4,4,4	0.33	0.74	14/15
31	lab Louis	France	debilis	DF	1	62-045	62-045-4b		Female	1.48	21.32	31.83	12.35	1	333?4	1110	2	?	0.39	0.67	16/14
32	lab MNHN	France	debilis	DF	1	62-045	62-045-5		Male(Juvenile)	1.3	18.81	27.64	7.68	2	3336(5)4	1110	2	4,4,4	0.277858	0.71	16/18
1	lab Louis	France	debilis	DF	1		Coll. Moniez. Pointe-aux-Oies. 2.9.89	lectotype	female	1.13	19.3	33.81	9.06	2	????3	?	2	4,4,4	0.267968	0.570837	？
2	lab Louis	France	debilis	DF	1		Coll. Moniez. Pointe-aux-Oies. 2.9.89	paralectotype 1	female	1.08	22.41	40.97	14.18	？	？	？	？	？	0.346107	0.546986	？
3	lab Louis	France	debilis	DF	1		Coll. Moniez. Pointe-aux-Oies. 2.9.89	paralectotype 2	female	？	？	？	？	？	？	？	？	？	？	？	？
40	lab MNHN	France	thalassophila	TF	1	62-016	62-016	6127D06	Female	1.32	32.5	30	5	1	33343	0	1	3,4,4	0.166667	1.08333	20/22
38	lab MNHN	France	thalassophila	TF	1	62-016	62-016-R		Male	1.35	37.5	35	5	1	33343	0	1	3,4,4	0.142857	1.07143	20/21
50	lab Louis	France	thalassophila	TF	1	62-016	62-016-S-44		Male(Juvenile)	1.11	24.77	26.73	6.04	1	33343	0	1	4,4,4	0.18	0.68	19/20
43	lab MNHN	France	thalassophila	$TF	1	62-017	62-017	06131B08	$?	1	25	25	2.5	1	????3	0	1	?	0.1	1	$
44	lab MNHN	France	thalassophila	TF	1	62-017	62-017	06131B07	Male(Juvenile)	1.1	25	30	5	1	??3?3	0	1	3,4,4	0.166667	0.833333	21/21
37	lab MNHN	France	thalassophila	TF	1	62-017	62-017(1)-22		Female	1.4	30	37.5	7.5	1	33343	0	1	4,4,4	0.2	0.8	21/21
42	lab MNHN	France	thalassophila	TF	2	62-044	62-044	06138B01 (A06)	Female	1.6	35	40	5	1	33343	0	?	?	0.125	0.875	16/17
41	lab MNHN	France	thalassophila	$TF	2	62-045	62-045	06138A09 (B08)	$juv	1.14	28.75	30	5	?	?	?	?	2,3,3	0.166667	0.958333	$
75	lab Louis	France	thalassophila	$TF	2	62-045	62-045 III left		$Male	1.15942	21.8182	31.8182	5.45455	1	33343	0	1	4,4,4	0.171429	0.685714	22/23
51	lab MNHN	France	thalassophila	TF	2	62-045	62-045-010601		Male	1.49	30	37.5	6.25	1	33343	0	1	4,4,4	0.166667	0.8	20/21
45	lab MNHN	France	thalassophila	$TF	2	62-045	62-045-010602L		$1st	0.85	23.75	25	3.75	1	33343	0	1	1,2,2	0.15	0.95	$
46	lab MNHN	France	thalassophila	TF	2	62-045	62-045-010603 right		Male(Juvenile)	1.22	30	30	5	1	33343	0	1	2,3,3	0.166667	1	19/20
47	lab MNHN	France	thalassophila	TF	2	62-045	62-045-010604 left		Female	1.85	?	34.59	6.13	1	33343	0	1	4,4,4	0.177219	#VALUE!	18/20
48	lab MNHN	France	thalassophila	$TF	2	62-045	62-045-010605L		$juv	1.48	22.26	24.66	3.88	1	33343	0	1	2,3,3	0.15734	0.902676	$
49	lab MNHN	France	thalassophila	TF	2	62-045	62-045-010605R		Female	1.9	23.93	31.02	4.47	1	33343	0	1	4,4,4	0.144101	0.771438	20/?
39	lab MNHN	France	thalassophila	TF	1	62-045	62-045-1		Female	1.7	36.25	45	7.5	1	33343	0	1	3,4,4	0.166667	0.805556	18/?
57	lab MNHN	Scotland	thalassophila	TS	1	GB-011	Dalmeny1		Female	1.9	27.47	35.52	6.14	1	33343	0	1	4,4,4	0.17286	0.773367	20/?
56	lab MNHN	Scotland	thalassophila	TS	1	GB-011	Dalmeny2		Female	1.7	32.5	40	7.5	1	33343	0	1	4,4,4	0.1875	0.8125	16/18
59	lab MNHN	Scotland	thalassophila	TS	1	GB-011	Dalmeny3		Female	1.61	25.3	34.45	5.21	1	33343	0	1	4,4,4	0.151234	0.734398	21/?
60	lab MNHN	Scotland	thalassophila	TS	1	GB-011	Dalmeny4		Female	1.6	32.5	40	6.25	1	33343	0	1	4,4,4	0.15625	0.8125	19/19
55	lab MNHN	Scotland	thalassophila	TS	1	GB-011	Dalmeny5		Female	1.65	25.3	32.95	6.35	1	33343	0	1	4,4,4	0.192716	0.76783	18/?
58	lab MNHN	Scotland	thalassophila	TS	1	GB-011	Dalmeny6(=5.3V)		Female	1.8	30	32,5 (II)	3,75 (II)	1	33343	0	1	4,4,4	0.12	0.92	22/21
61	lab MNHN	Scotland	thalassophila	TS	1	GB-011	DalmenyGB-011		Male	1.2	30	37.5	6.25	1	33343	0	1	4,4,4	0.166667	0.8	23/?
62	lab MNHN	Scotland	thalassophila	TS	1	GB-011	GB-011	25339A01	Female	1.4	35	37.5	5	1	33343	0	1	4,?,?	0.133333	0.933333	19/?
63	lab MNHN	Scotland	thalassophila	TS	1	GB-011	GB-011	25339A05	Female	1.45	35	35	3.75	1+2	33343	0	1	3,?,?	0.107143	1	21/22-23
64	lab MNHN	Scotland	thalassophila	TS	1	GB-011	GB-011	25339A04	male	?	30	32.5	5	1	?	?	?	?	0.153846	0.923077	20/?
65	lab MNHN	Scotland	thalassophila	$TS	1	GB-011	GB-011	25339A02	$?	?	?	42.5	7.5	?	?	?	?	?	0.176471	#VALUE!	$
66	lab MNHN	Scotland	thalassophila	TS	2	GB-011	GB-011-a(L)		Female	1.63	24.83	30.3	5.71	1	33343	0	1	4,4,4	0.188449	0.819472	18/19
67	lab MNHN	Scotland	thalassophila	TS	2	GB-011	GB-011-b(R)		Female	1.72	30	37.5	5	1	33343	0	1	4,4,4	0.133333	0.8	21/?
68	lab MNHN	Scotland	thalassophila	TS	1	GB-011	GB-011-c		Male	1.66	24.55	28.03	4.79	1	33343	0	1	4,4,4	0.170888	0.875847	22/22
69	lab MNHN	Scotland	thalassophila	TS	2	GB-011	GB-011-d(R)		Female	1.93	37.5	45	7.5	1	33343	0	1	4,4,4	0.166667	0.833333	20?/?
70	lab MNHN	Scotland	thalassophila	TS	2	GB-011	GB-011-e(L)		Male	1.51	27.48	32.24	5.27	1	33343	0	1	4,4,4	0.163462	0.852357	20/20
84	lab Scheu	Scotland	thalassophila		1	Dalmeny Est	litter, 12.V.35	holotype	Female	1.67	？	？	？	1	33343	?	1	4,4,4	#VALUE!	#VALUE!	18/19
85	lab Scheu	Scotland	thalassophila		1	Dalmeny Est	litter, 12.V.35 +	holotype	Female	1.63	27.62	34.42	6.5	1	33343	0	1	4,4,4	0.188844	0.80244	18/?
83	lab Scheu	Scotland	thalassophila		1	Dalmeny Est	litter, 12.V.35 ++	holotype	Female	1.12	21.03	24.4	4.2	1	33343	0	1	3,4,4	0.172131	0.861885	20/?
