# Supplementary material for: Unusually low genetic divergence at COI barcode locus between two species of intertidal Thalassaphorura (Collembola: Onychiuridae)
Source: PeerJ journal article supplement (doi:10.7717/peerj.5021), 2018-06-18

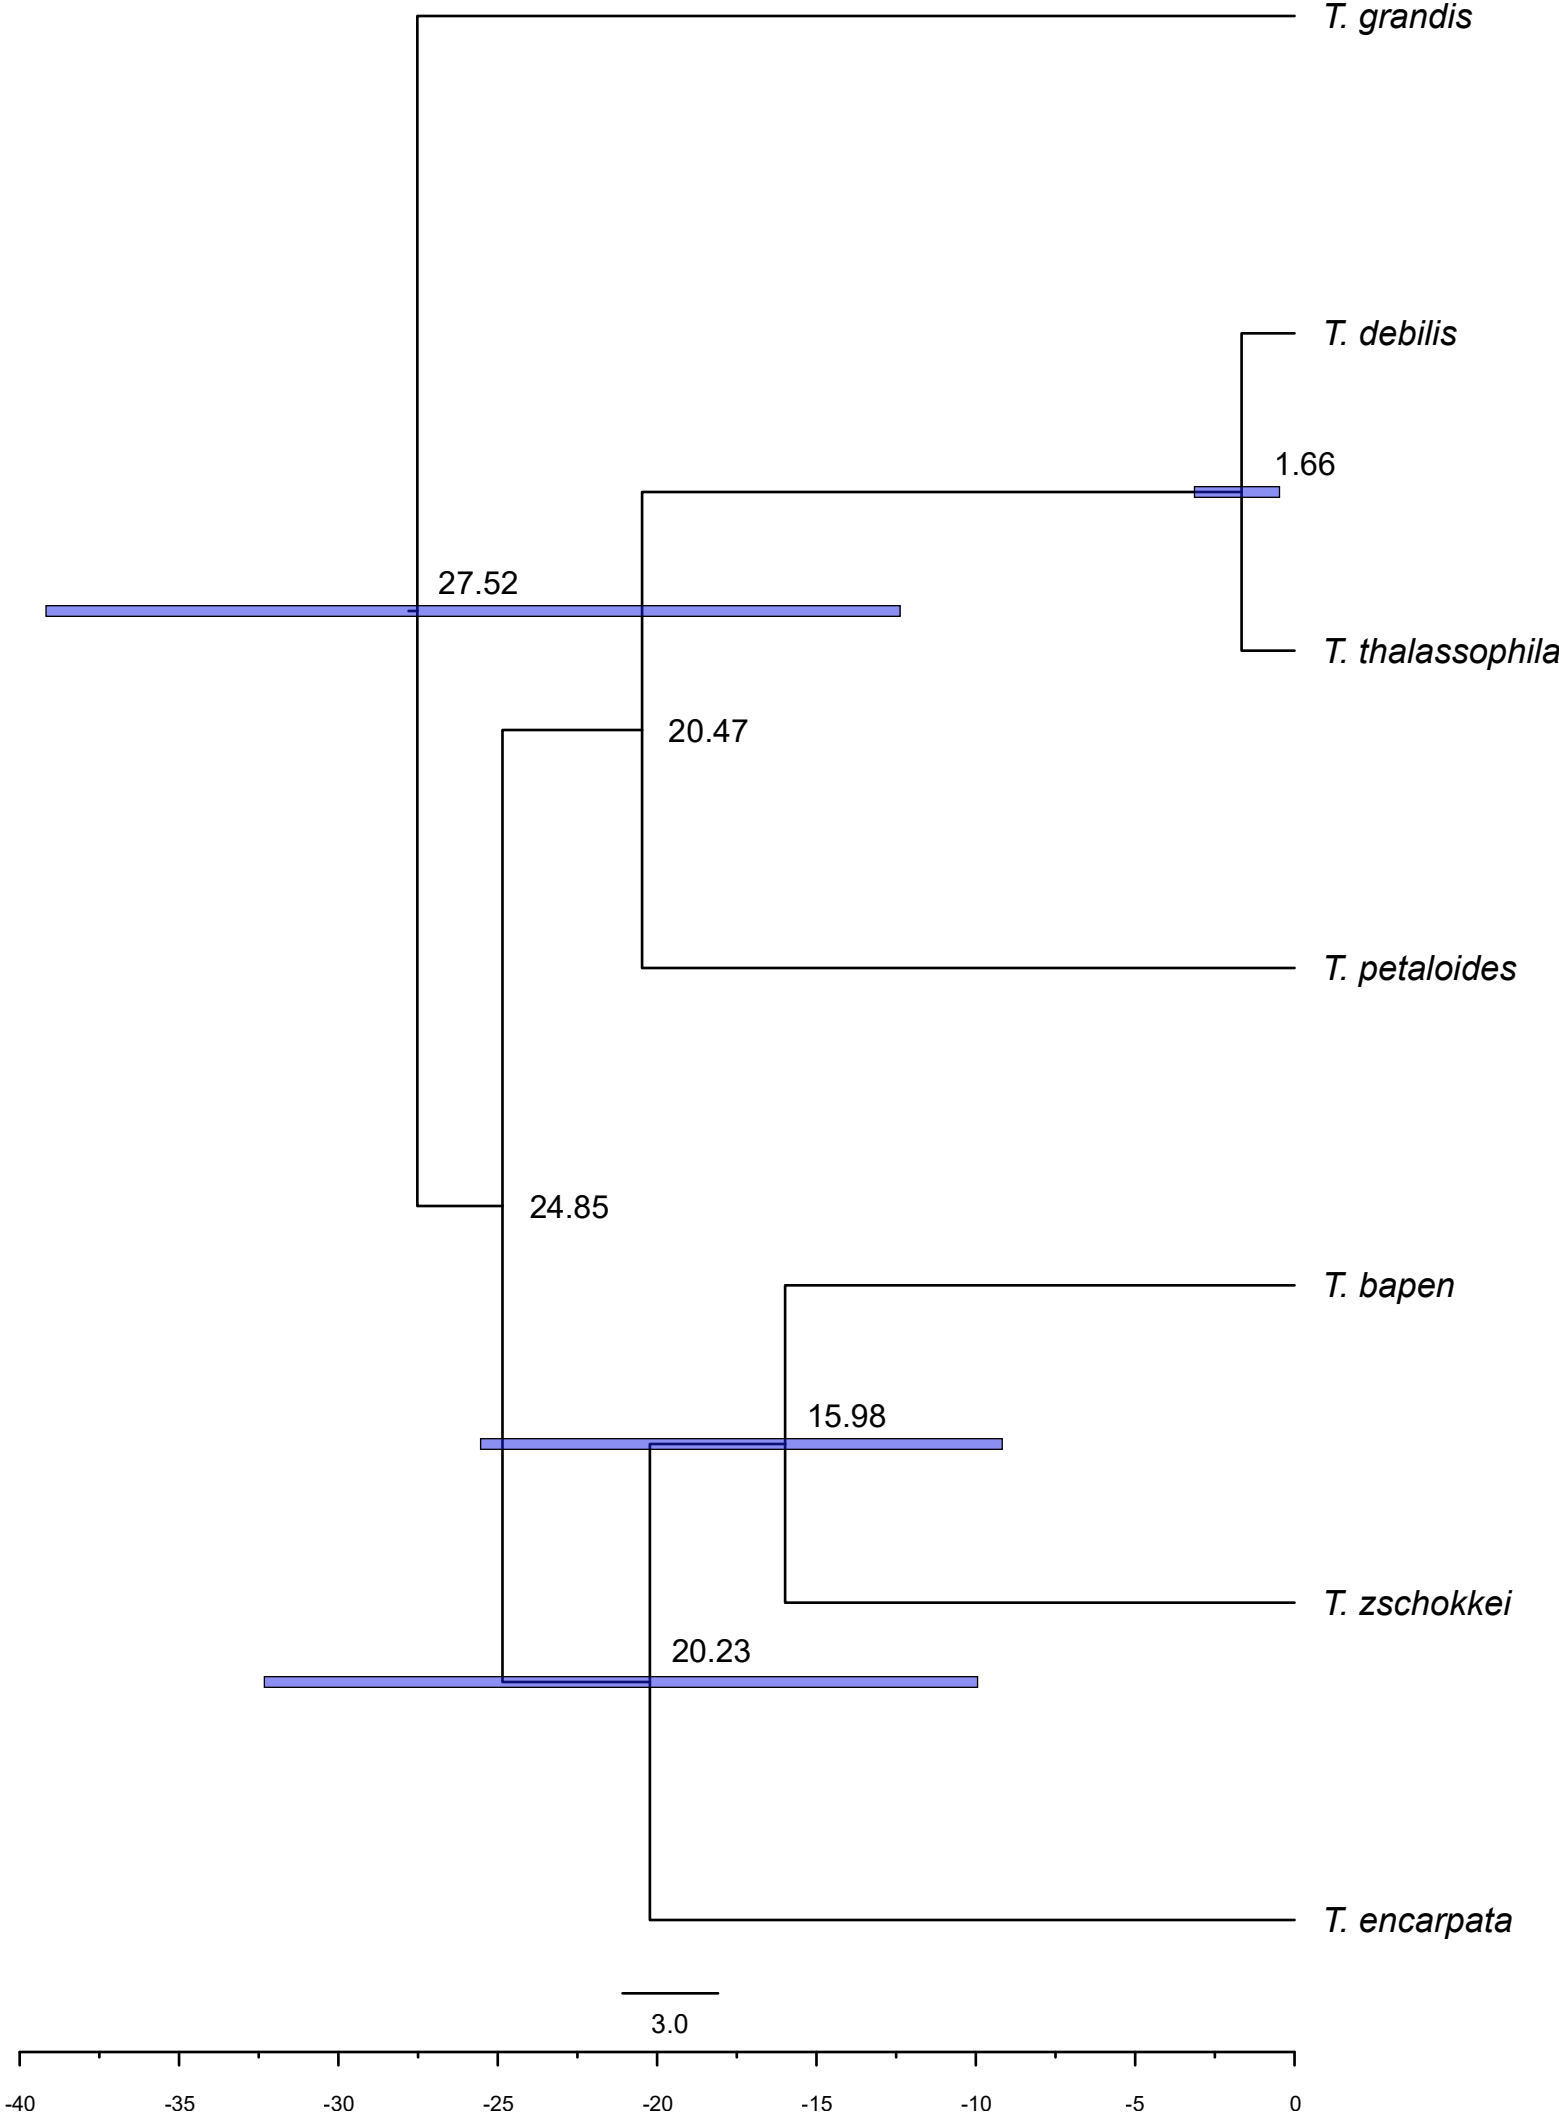

Supplement: Supplementary_Figure_2_Dating_estimation_on_a_species_tree_inferred_from_BEAST.pdf [file Supplementary_Figure_2_Dating_estimation_on_a_species_tree_inferred_from_BEAST.pdf]
